# 1,25(OH)<sub>2</sub>Vitamin D<sub>3</sub> Stimulates Myogenic Differentiation by Inhibiting Cell Proliferation and Modulating the Expression of Promyogenic Growth Factors and Myostatin in C<sub>2</sub>C<sub>12</sub> Skeletal Muscle Cells

Leah A. Garcia, Keisha K. King, Monica G. Ferrini, Keith C. Norris, and Jorge N. Artaza

Department of Internal Medicine (L.A.G., K.K.K., M.G.F., K.C.N., J.N.A.), Charles R. Drew University of Medicine and Science, and Department of Medicine (K.K.K., M.G.F., K.C.N., J.N.A.), David Geffen School of Medicine at University of California Los Angeles, Los Angeles, California 90095

Skeletal muscle wasting is an important public health problem associated with aging, chronic disease, cancer, kidney dialysis, and HIV/AIDS. 1,25-Dihydroxyvitamin D (1,25-D<sub>3</sub>), the active form of vitamin D, is widely recognized for its regulation of calcium and phosphate homeostasis in relation to bone development and maintenance and for its calcemic effects on target organs, such as intestine, kidney, and parathyroid glands. Emerging evidence has shown that vitamin D administration improves muscle performance and reduces falls in vitamin D-deficient older adults. However, little is known of the underlying mechanism or the role 1,25-D<sub>3</sub> plays in promoting myogenic differentiation at the cellular and/or molecular level. In this study, we examined the effect of 1,25-D<sub>3</sub> on myoblast cell proliferation, progression, and differentiation into myotubes. C<sub>2</sub>C<sub>12</sub> myoblasts were treated with 1,25-D<sub>3</sub> or placebo for 1, 3, 4, 7, and 10 d. Vitamin D receptor expression was analyzed by quantitative RT-PCR, Western blottings and immunofluorescence. Expression of muscle lineage, pro- and antimyogenic, and proliferation markers was assessed by immunocytochemistry, PCR arrays, quantitative RT-PCR, and Western blottings. Addition of 1,25-D<sub>3</sub> to C<sub>2</sub>C<sub>12</sub> myoblasts 1) increased expression and nuclear translocation of the vitamin D receptor, 2) decreased cell proliferation, 3) decreased IGF-I expression, and 4) promoted myogenic differentiation by increasing IGF-II and follistatin expression and decreasing the expression of myostatin, the only known negative regulator of muscle mass, without changing growth differentiation factor 11 expression. This study identifies key vitamin D-related molecular pathways for muscle regulation and supports the rationale for vitamin D intervention studies in select muscle disorder conditions. (*Endocrinology* 152: 2976–2986, 2011)

Vitamin D deficiency has been linked to fractures from falling, mainly in the older population, as a consequence of muscle weakness and waste (1). Common clinical manifestations of vitamin D deficiency in relation to muscle include symmetric low back pain, proximal muscle weakness, and muscle aches (2, 3).

Vitamin D deficiency correlates with a substantial decline in physical performance (4). Observational studies

support a positive association between vitamin D levels and muscle strength and/or lower extremity function in both active and inactive older adults (5–7). In one report, over 90% of patients presented to a community clinic, with nonspecific musculoskeletal pain, were found to have vitamin D deficiency (8). Moreover, the vitamin D receptor (VDR) is expressed in human muscle tissue (9), which provides a rationale for a direct role of vitamin D in muscle

ISSN Print 0013-7227 ISSN Online 1945-7170

Printed in U.S.A.

Copyright © 2011 by The Endocrine Society

doi: 10.1210/en.2011-0159 Received February 14, 2011. Accepted May 16, 2011.

First Published Online June 14, 2011

Abbreviations: 1,25-D<sub>3</sub>, 1,25-Dihydroxyvitamin D; DAPI, 4',6-diamidino-2-phenylindole; FBS, fetal bovine serum; FITC, fluorescein isothiocyanate; Fst, follistatin; GAPDH, glyceraldehyde-3-phosphate dehydrogenase; GDF-11, growth differentiation factor 11; ICC, immunocytochemistry; IF, immunofluorescence; IOD, integrated optical density; MHC, myosin heavy chain; Mstn, myostatin; MyoD, myoblast determination; PCNA, proliferating cell nuclear antigen; qRT-PCR, quantitative RT-PCR; VDR, vitamin D receptor.

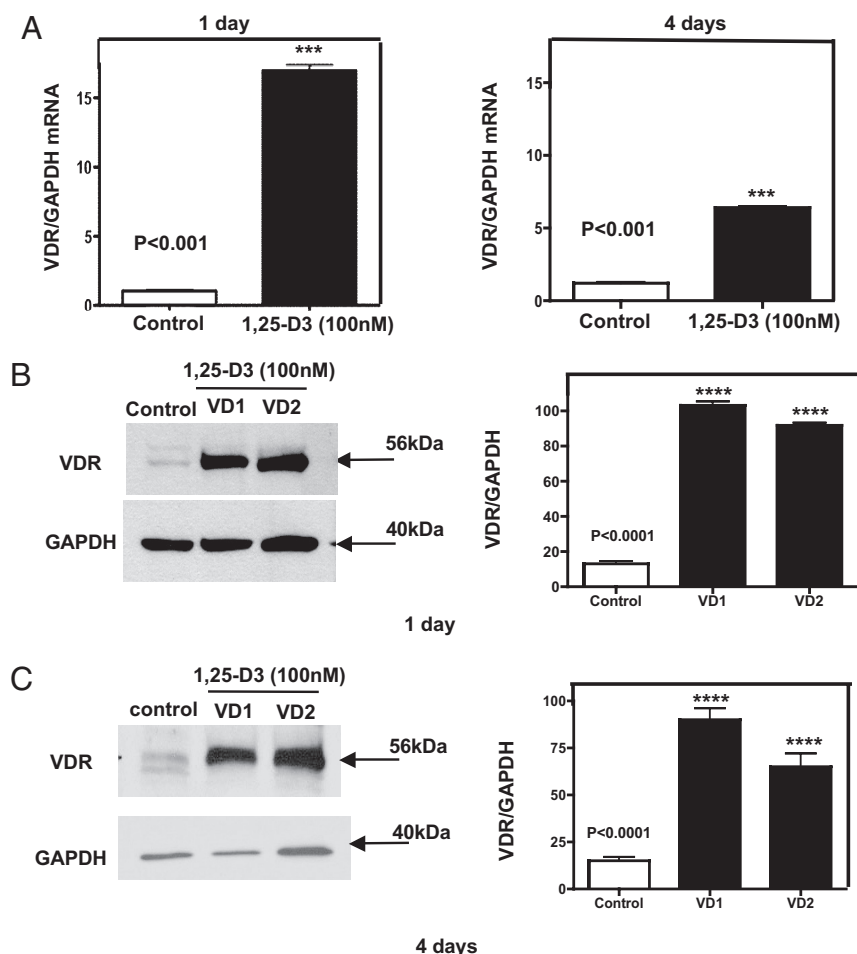

**FIG. 1.** Steady-state mRNA and protein up-regulation levels of VDR expression upon incubation of  $C_2C_{12}$  cells with 1,25-D3. Cultures of  $C_2C_{12}$  cells were incubated or not with 1,25-D3 (100 nM) for 1 and 4 d. Total RNA and whole-protein extracts were isolated for qRT-PCR and Western blottings, respectively. A, Mean  $\pm$  SEM corresponds to experiments done in triplicate; \*\*\*,  $P < 0.001$  and Western blottings. B and C, Mean  $\pm$  SEM corresponds to experiments done in triplicate; \*\*\*\*,  $P < 0.0001$  at 1 and 4 d, respectively. VD1 and VD2 are different pools of two samples each. In both cases, real-time PCR and Western blottings, samples and controls were normalized with GAPDH housekeeping gene. VD, Vitamin treated cells whole extracts; VDR, vitamin D receptor.

function. Muscle biopsies in adults with profound vitamin D deficiency showed predominantly type II (fast-twitch) muscle, which may help explain the falling tendency of vitamin D-deficient elderly individuals (10). It has been reported that 1,25-dihydroxyvitamin D (1,25-D3) induces genomic effects, leading to the synthesis of new proteins that affect muscle cell contractility, proliferation, and differentiation (11). Furthermore, mice lacking the VDR show a skeletal muscle phenotype with smaller and variable muscle fibers and persistence of immature muscle gene expression during adult life, suggesting a role of vitamin D in muscle development (12, 13). However, little is known of the underlying mechanism or the role it plays in association with myogenic differentiation.

Vitamin D, a fat-soluble secosteroid prohormone, is obtained from sun exposure or from dietary sources. Dur-

ing exposure to sunlight 7-dehydrocholesterol in the skin is converted to previtamin D3, which is immediately converted by a heat-dependent process to vitamin D3. Vitamin D2 and vitamin D3 from dietary sources are incorporated into chylomicrons, transported by the lymphatic system into the venous circulation. Vitamin D in the circulation is bound to the vitamin D-binding protein, which transports it to the liver, where vitamin D is converted by the vitamin D-25 hydroxylase to 25-hydroxyvitamin D3. 25-Hydroxyvitamin D3 is biologically inactive and is converted primarily in the kidney by the 25-hydroxyvitamin D-1 $\alpha$ -hydroxylase to its biologically active form 1,25-D3 or calcitriol (14).

Mouse  $C_2C_{12}$  skeletal muscle cells are an “*in vitro*” system widely used to study genes that regulate muscle growth and differentiation (15–17).  $C_2C_{12}$  myoblast cells differentiate rapidly, forming contractile myotubes and producing characteristic muscle proteins (16, 17).

The aim of the present study was to test the hypothesis that 1,25-D3 promotes myogenic cell differentiation and to determine the associated molecular mechanism(s). This was done by investigating the expression of key pro- and anti-cell differentiation lineage markers and select growth factors modulated by 1,25-D3 in a well-known and widely used skeletal muscle cell line model.

## Materials and Methods

### Cell culture

The mouse  $C^3H$  myoblast cell line  $C_2C_{12}$  (CRL-1772; American Type Culture Collection, Manassas, VA) was propagated in DMEM supplemented with 10% dialyzed fetal bovine serum (FBS) at 37 C and 5%  $CO_2$  (14, 15) at 40–50% confluence in T75 flasks. FBS is dialyzed by tangential flow filtration using 10,000 MW cutoff filters; this procedure eliminates many low molecular weight hormones and cytokines that could impact the cell culture. Cells were distributed on the appropriate plates for each assay (Lab-Tek chamber slides two-, four-, eight-, or six-well plates; Thermo Fisher Scientific Inc., Rockford, IL). The next day, cells were incubated or not with 100 nM of 1,25-D3 (Sigma-Aldrich, St. Louis, MO) dissolved in less than 0.1% ethanol as vehicle in DMEM 10% dialyzed FBS for 1–10 d. The 100 nM concentration of 1,25-D3 employed in the experimental design was based on our prior dose-response studies and is in align-

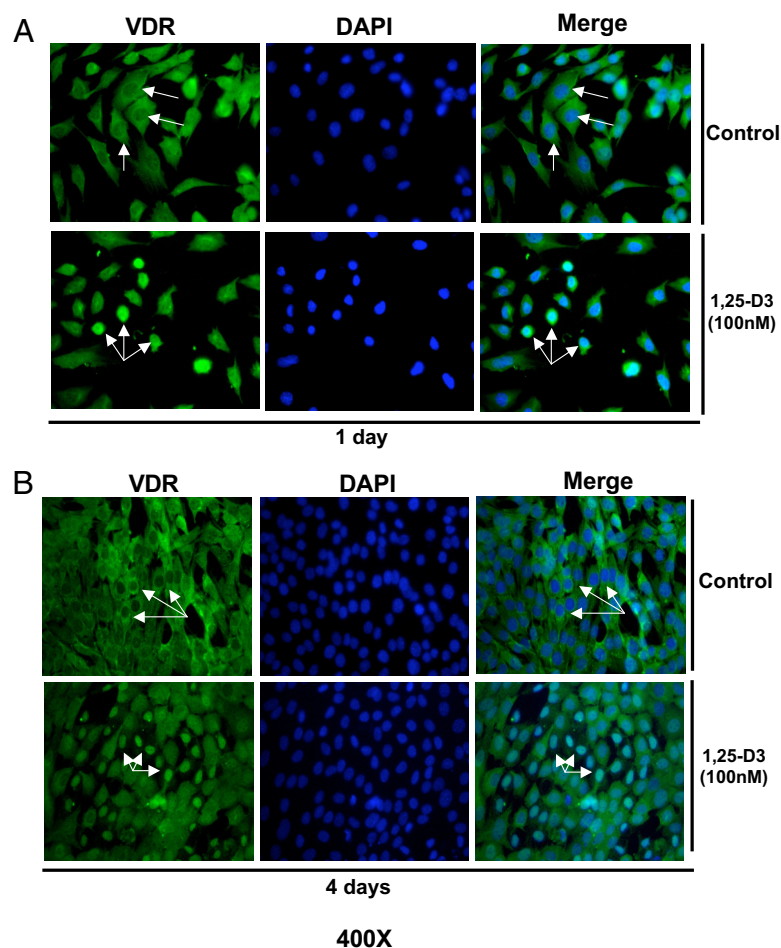

**FIG. 2.** Expression and nuclear translocation of VDR upon incubation of C<sub>2</sub>C<sub>12</sub> cells with 1,25-D<sub>3</sub>. Cultures of C<sub>2</sub>C<sub>12</sub> cells were treated as in Fig. 1 in four-well removable chamber slides and subjected to IF using a polyclonal antibody for VDR followed by a FITC-conjugated secondary antibody (green). Cells were counterstained with DAPI (blue) to show nuclear localization. Merge pictures were done combining the green and blue pictures together to show nuclear translocation of VDR. Magnification,  $\times 400$ . A, Cells incubated or not with 1,25-D<sub>3</sub> for 1 d. B, Cells incubated or not with 1,25-D<sub>3</sub> for 4 d.

ment with a commonly used dose used in the majority of publications related to 1,25-D<sub>3</sub> effects on different cell lines or even in primary cell cultures (18–23). Because of the 10-h half-life of 1,25-D<sub>3</sub>, the cell culture media, incubated or not with 1,25-D<sub>3</sub> (100 nM), were replaced daily (18).

#### Detection of VDR by immunofluorescence (IF)

At the completion of the incubation time, treated and untreated cells were washed thrice with PBS (1 $\times$ ) and fixed by immersion in 2% *p*-formaldehyde. The nonspecific binding sites/epitopes were blocked with 10% normal goat serum and incubated with an affinity purified rabbit polyclonal antibody raised against a peptide mapping at the C terminus of VDR at a dilution of 1:50 (Santa Cruz Biotechnology, Inc., Santa Cruz, CA). The detection was followed by a 1:200 dilution of antirabbit biotinylated secondary antibody (Calbiochem, La Jolla, CA), followed by Streptavidin-fluorescein isothiocyanate (FITC) (10  $\mu$ g/ml; Vector Laboratories, Burlingame, CA). After several washes, the slides were detached and counterstained/mounted in “vectashield” mounting medium with 4',6-diamidino-2-phenylindole (DAPI) (Vector Laboratories).

The merge image was obtained by fusing the green (FITC) and the blue (DAPI) filters pictures. Fields were photographed with a SPOT-RT digital camera and acquisition software (Diagnostic Instruments, Sterling Heights, MI). Negative controls were done by either omitting the first antibody or using a rabbit non-specific IgG (18).

#### PCR array analysis of skeletal muscle growth and differentiation factors

RT<sup>2</sup> Profiler PCR pathway focused arrays (SABiosciences Corp., Frederick, MD) were applied in triplicate to detect changes in gene expression of skeletal muscle growth and differentiation factors. Total RNA from C<sub>2</sub>C<sub>12</sub> cells control (untreated) and treated with 1,25-D<sub>3</sub> (100 nM) for 4 d were isolated with Trizol-Reagent (Invitrogen, Carlsbad, CA). Total RNA aliquots were converted by RT, and the resulting cDNA were subjected to the Mouse Growth Factor (PAMM-041) and the Mouse Skeletal Muscle: Myogenesis & Myopathy (PAMM-099) PCR arrays (SABiosciences Corp.). The mouse growth factor RT<sup>2</sup> Profiler PCR array contains genes related to growth factors that play vital roles in various normal biological processes, such as embryogenesis, wound healing, and inflammation. The Mouse Skeletal Muscle: Myogenesis & Myopathy RT<sup>2</sup> Profiler PCR array contains genes related to skeletal muscle differentiation, function, and disease-related processes. Real-time PCR were performed as follows: melting for 10 min at 95 C, 40 cycles of two-step PCR, including melting for 15 sec at 95 C, annealing for 1 min at 60 C. The raw data were analyzed using the  $\Delta\Delta C_t$  (cycle threshold) method following the manufacturer's instructions (SABiosciences Corp.) (18, 19).

#### Real-time quantitative PCR

Total RNA was extracted using Trizol-Reagent (Applied Biosystems, Foster City, CA) and equal amounts (1  $\mu$ g) of RNA were reverse transcribed using the RT<sup>2</sup> First Strand kit (CO-3) (SABiosciences Corp.). Mouse gene PCR primer sets (RT<sup>2</sup>) for VDR, IGF-I, IGF-II, myostatin (Mstn), and follistatin (Fst) were obtained from SABiosciences Corp. The QIAGEN RT<sup>2</sup> SYBR Green/ROX qPCR Master Mix (QIAGEN, Valencia, CA) was used with the ABI Step One Plus PCR thermocycler and fluorescent detector lid (Applied Biosystems) (18, 19). The protocol included melting for 15 min at 95 C, 40 cycles of two-step PCR including melting for 10 min at 95 C, 40 cycles of two-step PCR, including melting for 15 sec at 95 C, annealing for 1 min at 60 C. Samples of 25 ng of cDNA were analyzed in triplicate in parallel with glyceraldehyde-3-phosphate dehydrogenase (GAPDH) and ribosomal protein, large P1, (data not shown) controls; standard curves (threshold cycle *vs.* log picogram of cDNA) were generated by log dilutions from 0.1 pg to 100 ng of standard cDNA (RT mRNA from C<sub>2</sub>C<sub>12</sub> cells in growth medium). Experimental mRNA starting quantities were then calculated from the standard curves and averaged as previously described (17, 18). The ratios of marker experimental gene (*e.g.* VDR, IGF-I, IGF-II, Mstn, and Fst mRNA) to GAPDH mRNA were computed and normalized to control (untreated) samples as 100%.



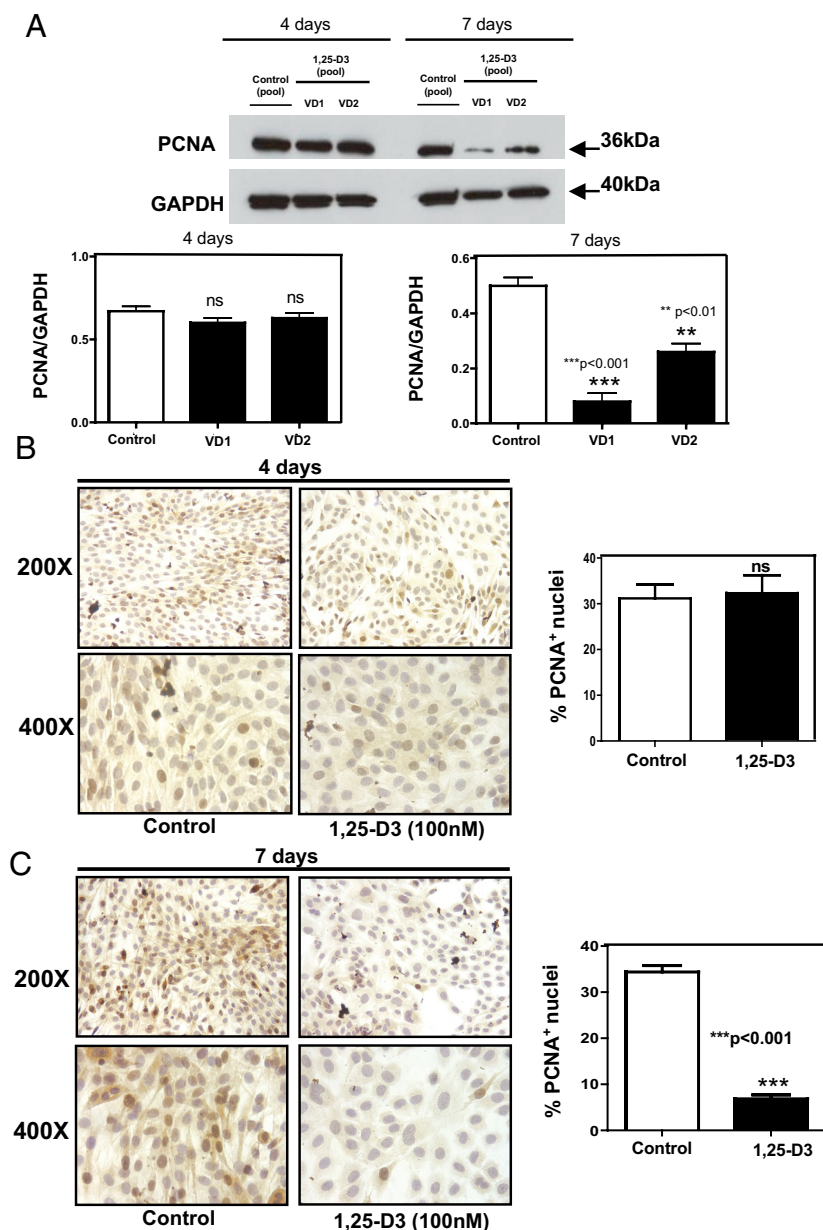

**FIG. 3.** 1,25-D3 down-regulates the expression of PCNA. Cultures of  $C_2C_{12}$  cells were treated as in Fig. 1 for 4 and 7 d. Western blottings and ICC reactions for PCNA were performed at the end of the incubation time. A, Western blots analysis was performed for whole-protein extracts at 4 and 7 d with different pools of samples (VD1 and VD2) done in triplicate with the corresponding densitometric analysis; \*\*\*,  $P < 0.001$  and \*\*,  $P < 0.01$ . B, Representative ICC pictures with the corresponding image analysis expressing percentage of positive cells (brown nuclear staining) for experiments done in triplicate at 4 d. C, Representative ICC pictures with the corresponding image analysis expressing percentage of positive cells (brown nuclear staining) for experiments done in triplicate at 7 d; \*\*\*,  $P < 0.001$ . Magnification,  $\times 200$  and  $\times 400$ . ns, Not significant; VD, vitamin treated cells whole extracts.

### Immunocytochemical analyses of proliferating cell nuclear antigen (PCNA), myogenic markers, and Mstn

After the corresponding incubation time with or without 1,25-D, cells were washed five times with PBS (1 $\times$ ) and fixed by immersion in 2% *p*-formaldehyde, quenched with  $H_2O_2$ , blocked with normal goat or horse serum, and incubated with the following antibodies: anti-PCNA monoclonal antibody (1:400; Millipore,

Billerica, MA), antimyoblast determination (MyoD) rabbit polyclonal antibody (1:500; Santa Cruz Biotechnology, Inc.), antidesmin (1:100) and antimyosin heavy chain (MHC) type II (1:100) rabbit polyclonal antibodies (Abcam, Inc., Cambridge, MA), and anti-Mstn rabbit polyclonal antibody (1:200; Millipore, Temecula, CA). Detection was based on a secondary biotinylated antimouse or antirabbit antibody (1:200), followed by addition of the streptavidin-horseradish peroxidase avidin and biotinylated horseradish macromolecular complex (1:100), Vectastain (Elite ABC System; Vector Laboratories), and peroxidase substrate kit (Vector Laboratories). The cells were counterstained with Hematoxylin QS (Vector Laboratories). Negative controls were done by either omitting the first antibody or using a rabbit nonspecific IgG. To ensure specific staining of VDR and Mstn antibodies, negative controls were done by preabsorbing the primary antibodies with specific synthetic peptides. After 1 h of incubation at room temperature, the mixtures were centrifuged at full speed for 15 min, and the supernatants were used as primary antibodies at the same dilution used previously for the experiment. No positive staining was observed in the cells by immunocytochemistry (ICC) in those negative controls (19).

### Western blot and densitometry analyses

Cell lysates (30–60  $\mu$ g of protein) were subjected to Western blot analyses after separation of proteins on 4–15% Tris-HCl polyacrylamide gradient gels by electrophoresis (Bio-Rad, Hercules, CA) in running buffer (Tris, glycine, and sodium dodecyl sulfate). Proteins were horizontally transferred for 3 h to nitrocellulose membranes in transfer buffer (Tris, glycine, and methanol). The nonspecific binding was blocked by immersing the membranes into 5% non-fat dried milk, 0.1% (vol/vol) Tween 20 in 1 $\times$  PBS overnight at 4 C. After several washes with washing buffer (PBS Tween 0.1%), membranes were incubated with the primary antibodies for 3 h at room temperature or overnight at 4 C, monoclonal antibodies were as follows: 1) PCNA (1:500) and 2) GAPDH (1:10,000; Millipore). Polyclonal antibodies were used for: 1) VDR (1:500; Santa Cruz Biotechnology, Inc.), 2) Mstn (1:500; Millipore), 3) IGF-I (1:500), 4) IGF-II (1:500), and 5) Fst (1:800; Abcam, Inc.). The washed membranes were incubated for 1 h at room temperature with 1:3000 dilution (antimouse) or 1:2000 dilution (antirabbit) of secondary antibody linked to horseradish peroxidase, respectively (Cell Signaling Technology, Inc., Danvers, MA). After several washes, the immunoreactive bands were visualized using the Amersham Enhanced Chemiluminescence

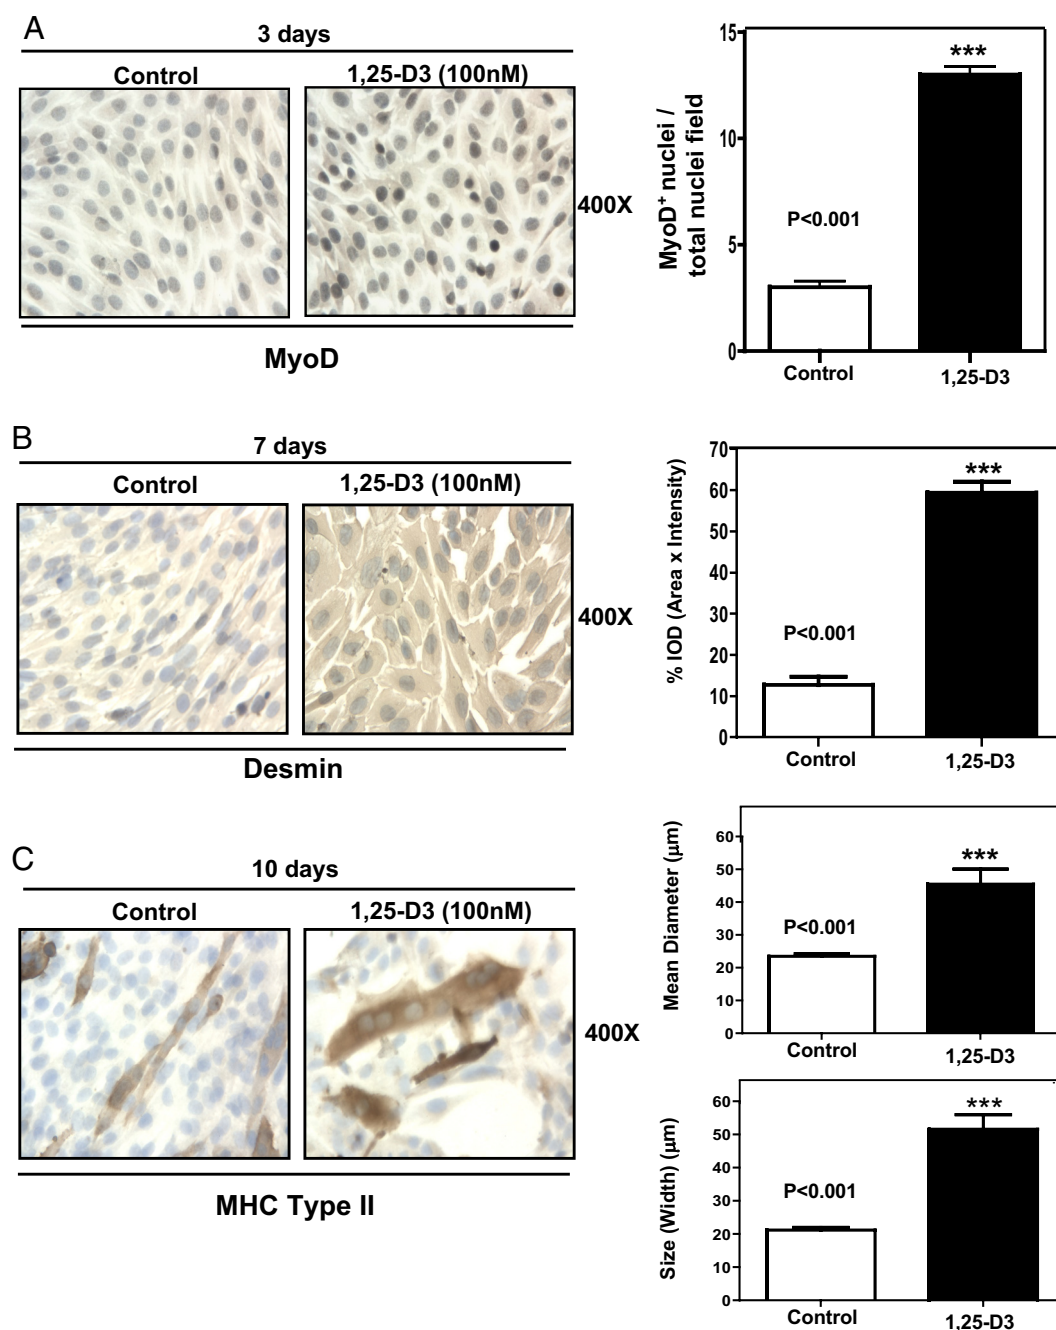

**FIG. 4.** 1,25-D<sub>3</sub> stimulates myogenic differentiation in C<sub>2</sub>C<sub>12</sub> cells. Cultures of C<sub>2</sub>C<sub>12</sub> cells were treated as in Fig. 1 for 3, 7, and 10 d. A, Representative immunocytochemistry pictures of MyoD<sup>+</sup> cells with the corresponding image analysis expressing the ratio between MyoD<sup>+</sup> nuclei per total nuclei field for experiments done in triplicate at 3 d. \*\*\*,  $P < 0.001$ . B, Representative ICC pictures of desmin<sup>+</sup> cells with the corresponding image analysis expressing percentage IOD (area  $\times$  intensity) for experiments done in triplicate at 7 d; \*\*\*,  $P < 0.001$ . C, Representative ICC pictures of MHC type II<sup>+</sup> cells with the corresponding image analysis expressing mean diameter ( $\mu$ m) and size (width) ( $\mu$ m) for experiments done in triplicate at 10 d; \*\*\*,  $P < 0.001$ . Magnification,  $\times 400$ .

Western blotting detection system (GE Healthcare, Buckinghamshire, UK). The densitometry analysis of the bands was done with ImageJ 1.40g Image software (National Institute of Health, Bethesda, MD) (18, 19).

#### Qualitative and quantitative immunocytochemical analyses

The immunoreactivity was quantified by Image Analysis using ImagePro-Plus 5.1 software (Media Cybernetics, Silver Spring,

MD). Fields were counted blindly by two independent observers, and each experiment was repeated thrice. For PCNA and MyoD determinations, the number of positive cells at  $\times 400$  was counted in a computerized grid, and results were expressed as a percentage of positive cells per field. For desmin, and Mstn determinations, once the images were calibrated for background lighting, integrated optical density (IOD) was determined. The IOD results are proportional to the mean optical density per area and determine the amount of immunoreactive antigen present in each cell. The IOD

**TABLE 1.** Differential steady-state mRNA levels of pro- and antimyogenic growth factors and myogenic markers between 1,25-D3 treated and untreated C<sub>2</sub>C<sub>12</sub> cells

| Gene symbol | Description                | Reference Sequence | Fold up-regulation (+) or down-regulation (–) | Confidence interval (95%)    |
|-------------|----------------------------|--------------------|-----------------------------------------------|------------------------------|
| MyoD        | Myogenic differentiation-1 | NM_010866          | +3.01                                         | (1.40, 4.73) <sup>b</sup>    |
| Myog        | Myogenin                   | NM_031189          | +4.85                                         | (1.42, 8.29) <sup>a</sup>    |
| Des         | Desmin                     | NM_010043          | +2.39                                         | (1.65, 4.05) <sup>b</sup>    |
| IGF-I       | IGF-I                      | NM_010512          | –9.79                                         | (0.03, 0.23) <sup>b</sup>    |
| IGF-II      | IGF-II                     | NM_010514          | +7.84                                         | (1.37, 17.37) <sup>a</sup>   |
| Mstn        | Mstn (GDF-8)               | NM_010834          | –3.98                                         | (0.00001, 0.88) <sup>a</sup> |
| GDF11       | GDF-11                     | NM_010272          | +1.19                                         | (0.00001, 4.29)              |

Total RNA from cells treated as in Fig. 1 for 4 d was subjected to RT real-time PCR by the growth factor PCR array, and the ratios between the 1,25-D3-treated and 1,25-D3-untreated cells corrected by GAPDH were calculated for assays performed in triplicate. Experiments were done in triplicate.

<sup>a</sup>  $P < 0.05$ .

<sup>b</sup>  $P < 0.001$ .

values are expressed in arbitrary units and were determined in at least 20 pictures at  $\times 400$  per treatment and time points. For MHC type II determinations, the diameter defined as (mean) average length of diameters was measured at two-degree intervals and passing through objects centroid. Size (width) was measured and defined as feret diameter (*i.e.* caliper length) along minor axis of object. Diameter and size (width) of MHC positive cells were determined in at least 20 pictures at  $\times 200$  per treatment and time points. The results expressed as mean  $\pm$  SEM represent the average of three independent experiments (18, 19, 24).

### Statistical analysis

All data are presented as mean  $\pm$  SEM. Multiple comparisons were analyzed by a one-way ANOVA (or *t* test). If the overall ANOVA revealed significant differences, then pair-wise comparisons between groups were performed by Tukey multiple comparison test. All comparisons were two-tailed, and *P* values of less than 0.05 were considered statistically significant. *In vitro* experiments were repeated thrice, and data from representative experiments are shown. Specifically, the RT<sup>2</sup> Profiler PCR arrays were done in triplicate and in some cases confirmed by real-time quantitative PCR done in triplicate. For PCR array and real-time PCR analysis, we consider significant changes in gene expression values of  $\pm 2.0$ -fold change respect to control.

## Results

### Time course of expression and nuclear translocation of VDR in C<sub>2</sub>C<sub>12</sub> skeletal muscle cells upon incubation with 1,25-D3

To determine whether the C<sub>2</sub>C<sub>12</sub> skeletal muscle cells expressed VDR at a basal level and whether its expression and nuclear translocation is induced upon incubating the cells with 1,25-D3, experiments using quantitative real-time PCR, Western blotting, and IF were carried out at different time points. C<sub>2</sub>C<sub>12</sub> skeletal muscle cells were continuously incubated or not with 1,25-D3 (100 nM) for 1 and 4 d. The increased expression of VDR after incubation with 1,25-D3 was demonstrated by real-time PCR [quantitative RT-PCR (qRT-PCR)] (Fig. 1A). VDR mRNA ex-

pression was increased by 15.1- and 6.4-fold at 1 and 4 d, respectively, compared with the controls (no 1,25-D3 addition). The increased expression of VDR after 1,25-D3 incubation at 1 and 4 d was further confirmed by Western blot analyses using whole-cell culture homogenates under the same conditions as above. The densitometric analysis of the bands showed an increased VDR expression upon incubation with 1,25-D at 1 and 4 d by 5- and 3.6-fold, respectively (Fig. 1, B and C). IF studies showed, both at 1 and 4 d, a basal cytoplasmic localization of VDR receptor (green). At 1 d, and even more evident after 4 d of 1,25-D3 incubation, most of the green-fluorescence staining corresponding to VDR was localized in the nucleus (Fig. 2, A and B). The counterstaining with DAPI (blue) and the merge of green and blue pictures confirmed the nuclear translocation/localization of VDR.

### 1,25-D3 inhibits cell proliferation of C<sub>2</sub>C<sub>12</sub> skeletal muscle cells

To evaluate the effects of 1,25-D3 on cell proliferation, C<sub>2</sub>C<sub>12</sub> skeletal muscle cells were incubated with or without 1,25-D3 (100 nM) for 4 and 7 d. At the end of the respective incubation times, proliferation was evaluated by determining the expression of PCNA by Western blotting and ICC. C<sub>2</sub>C<sub>12</sub> skeletal muscle cells incubated with 1,25-D for 4 d did not show any significant differences in PCNA expression with respect to control cells (Fig. 3, A and B). On the contrary, cells incubated with 1,25-D3 for 7 d showed a 75% reduction in the expression of PCNA by Western blotting. (Fig. 3A). The Western blotting results were further confirmed by ICC (Fig. 3C), where quantitative image analysis of the pictures at 7 d showed a reduction in 85% with respect to the control ( $P < 0.001$ ).

### 1,25-D3 enhances myogenesis in C<sub>2</sub>C<sub>12</sub> skeletal muscle cells

To demonstrate that 1,25-D3 promotes myogenic differentiation in C<sub>2</sub>C<sub>12</sub> myoblasts, we evaluated the expres-



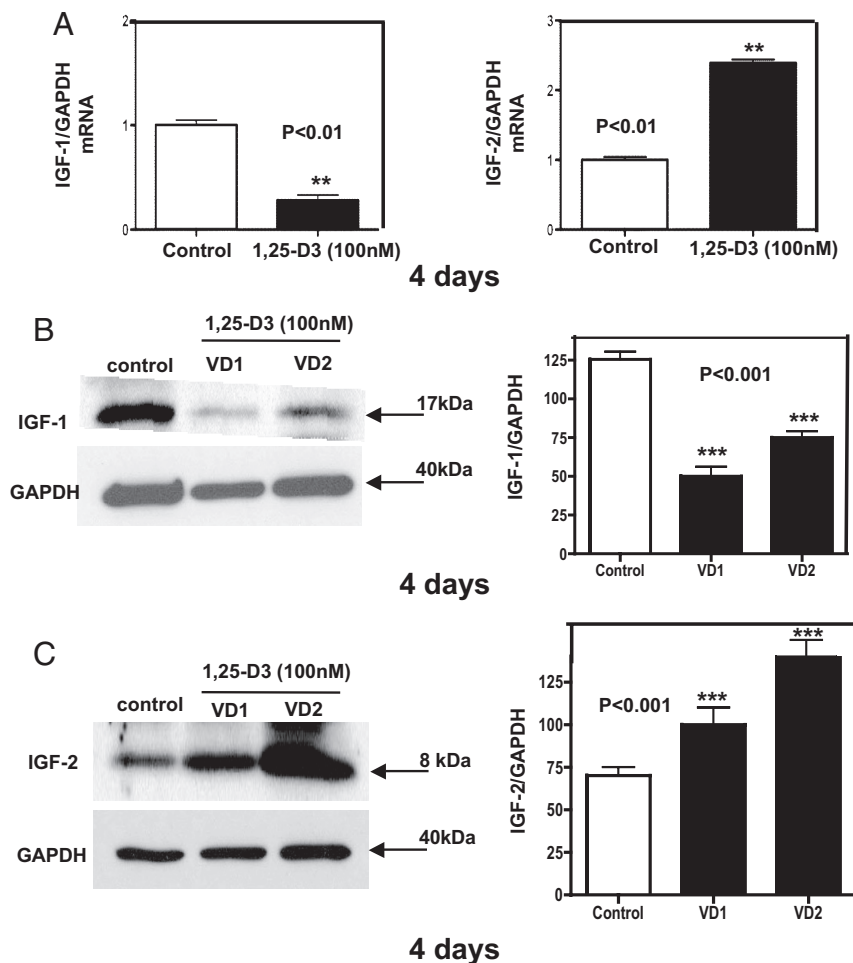

**FIG. 5.** Steady-state mRNA and protein levels modulation of IGF upon incubation of C<sub>2</sub>C<sub>12</sub> cells with 1,25-D<sub>3</sub>. Cultures of C<sub>2</sub>C<sub>12</sub> cells were incubated as in Fig. 1 for 4 d. Total RNA and whole-protein extracts were isolated for qRT-PCR and Western blottings, respectively. A, Mean  $\pm$  SEM corresponds to experiments done in triplicate for IGF-I (left panel); \*\*,  $P < 0.01$  and IGF-II (right panel); \*\*,  $P < 0.01$ . B, Western blottings with the respective densitometric analysis for IGF-I; \*\*\*,  $P < 0.001$ . C, Western blottings with the respective densitometric analysis for IGF-II; \*\*\*,  $P < 0.001$ . VD1 and VD2 correspond to different pools of two samples each. In both cases, real-time PCR and Western blottings, samples and controls were normalized with GAPDH housekeeping gene. VD, Vitamin treated cells whole extracts.

sion of sequential myogenic markers such as MyoD, desmin, and MHC type II at different time points by ICC followed by quantitative image analysis. Figure 4A shows that 3 d upon continuous incubation with 1,25-D<sub>3</sub>, an increased expression of the early myogenic marker MyoD was observed in the nucleus of C<sub>2</sub>C<sub>12</sub> cells. This observation was confirmed by quantitative image analysis (Fig. 4A, right panel), where MyoD expression was significantly increased by 4-fold with respect to the control ( $P < 0.001$ ). The expression of desmin, an intermediate myogenic marker, also was increased after 7 d of continuous incubation with 1,25-D<sub>3</sub>. As in the previous case, the visual inspection was confirmed by quantitative image analysis (Fig. 4B, right panel), where desmin expression was increased by 6-fold with respect to the control ( $P < 0.001$ ). After 10 d of incubating the cells with 1,25-D<sub>3</sub>, the

positive MHC type II polynucleated myotubes showed a significant 2-fold increase in the mean diameter of the fibers ( $P < 0.001$ ) and an increase by 2.5-fold in size (width) with respect to the control ( $P < 0.001$ ); this is a clear indication of fiber hypertrophy as a consequence of 1,25-D<sub>3</sub> incubation (Fig. 4C).

### 1,25-D<sub>3</sub> enhances myogenic commitment by modulating the expression of pro- and antimyogenic growth factors in C<sub>2</sub>C<sub>12</sub> skeletal muscle cells

The effect of 1,25-D<sub>3</sub> on specific myogenic markers of cell differentiation and growth factors were evaluated at the steady-state mRNA level by applying the mouse skeletal muscle myogenesis and growth factor PCR arrays. Table 1 shows the differential steady-state mRNA levels between 1,25-D<sub>3</sub> treated (4 d) and untreated cells for determinations done in triplicate after 4 d of incubation with 1,25-D<sub>3</sub>. The PCR array analysis showed positive up-regulation of the expression of the myogenic markers such as MyoD (+3.01) and desmin (+2.39). The 1,25-D<sub>3</sub> promyogenic effects are even more evident in the case of myogenin, showing a positive value of +4.85 in spite of previous findings that showed that the peak of myogenin expression is around 7 d after the initial myogenic differentiation (25).

Changes in the expression of pro- and antimyogenic factors were also observed: 1) a down-regulation in the expression of IGF-I (−9.79), 2) an up-regulation in the expression of IGF-II (+7.84), and 3) most importantly, a marked down-regulation of Mstn (−3.98) and no significant change in growth differentiation factor 11 (GDF-11) (+1.19) expression, a TGF $\beta$  family member that shares a high level of homology with Mstn.

The decreased expression of IGF-I and the increased expression of IGF-II after 1,25-D<sub>3</sub> incubation was further confirmed at 4 d by quantitative real-time PCR, where IGF-I expression decreased by 3-fold and IGF-II expression increased by 2.5-fold compared with the control ( $P < 0.01$ ) (Fig. 5A). To confirm the previous results, not only at the steady-state mRNA level but also at the protein level, Western blottings with the respective densitometric

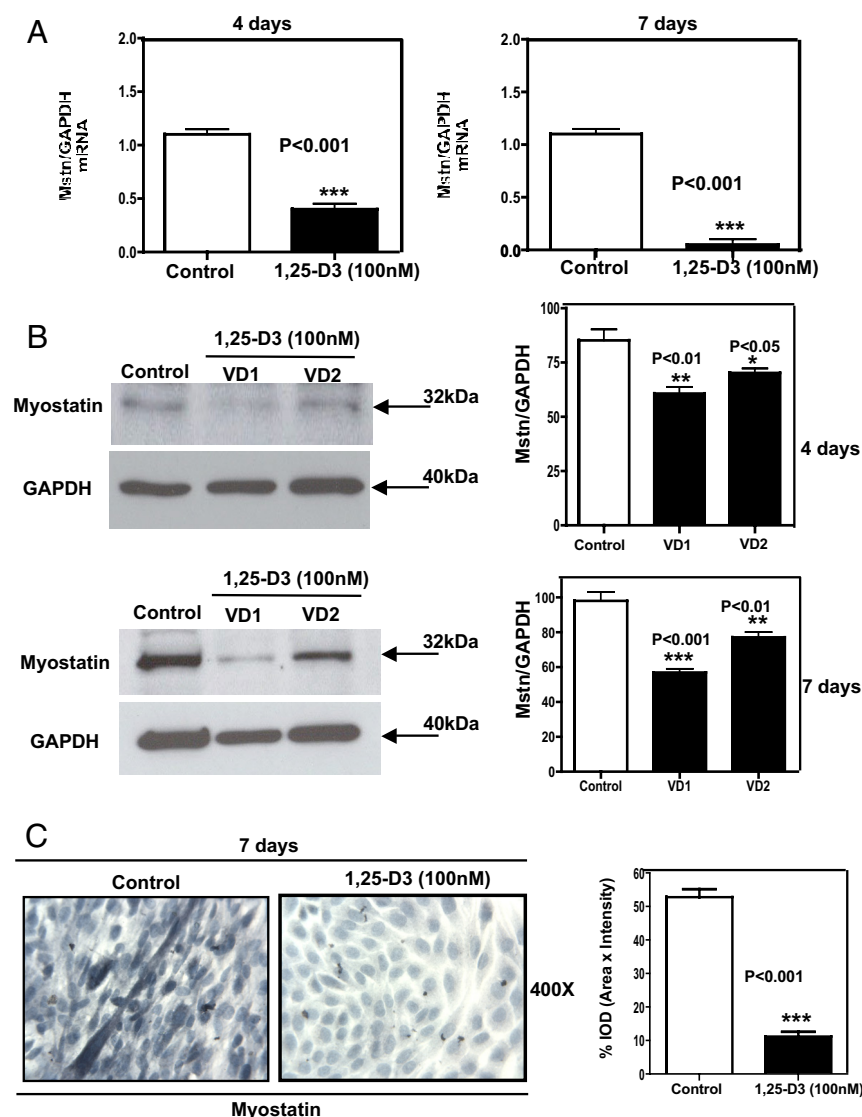

**FIG. 6.** 1,25-D3 down-regulates the expression of Mstn in  $C_2C_{12}$  cells. Cultures of  $C_2C_{12}$  cells were treated as in Fig. 1 for 4 and 7 d. Total RNA and whole-cell protein extracts were isolated for qRT-PCR and Western blottings, respectively.  $C_2C_{12}$  were also subjected to Mstn ICC. A, Mean  $\pm$  SEM corresponds to experiments done in triplicate for Mstn at 4 d (left panel);  $***$ ,  $P < 0.001$  and at 7 d (right panel);  $***$ ,  $P < 0.001$ . B, Western blottings with the respective densitometric analysis for Mstn at 4 d (upper panel);  $**$ ,  $P < 0.01$  and  $*$ ,  $P < 0.05$  and for 7 d (lower panel);  $**$ ,  $P < 0.01$  and  $***$ ,  $P < 0.01$ . VD1 and VD2 are different pools of two samples each. In both cases, qRT-PCR (A) and Western blottings (B), samples and controls were normalized with GAPDH housekeeping gene. C, Corresponds to representative ICC pictures of Mstn<sup>+</sup> cells with the corresponding image analysis expressing percentage IOD (area  $\times$  intensity) for experiments done in triplicate at 7 d;  $***$ ,  $P < 0.001$ . VD, Vitamin treated cells whole extracts.

analysis were done in triplicate for IGF-I (Fig. 5B) and for IGF-II (Fig. 5C). Similarly, a decreased expression of IGF-I and an increased expression of IGF-II were found by real-time PCR and Western blottings analysis after 7 d of incubation with 1,25-D3 (data not shown).

Because PCR arrays showed a decreased expression of Mstn upon incubating the cells with 1,25-D3, and because Mstn is the only known negative regulator of skeletal muscle mass, we further confirmed the PCR arrays by quan-

titative real-time PCR at d 4 and especially at d 7, where Mstn is highly expressed in  $C_2C_{12}$  cells (16). The real-time PCR for Mstn performed at d 4 and 7 showed a remarkable decrease in Mstn expression by 2.5- and 10-fold, respectively, compared with the control ( $P < 0.001$ ) (Fig. 6A). The decreased expression of Mstn at the protein level was shown by Western blottings, with the respective densitometric analysis, done in triplicate at 4 and 7 d (Fig. 6B). Moreover, ICC with the corresponding image analysis at 7 d revealed that Mstn was clearly localized primarily in the cytoplasm of control myotubes, and it was almost negligibly expressed in cells incubated with 1,25-D3 (Fig. 6C, left panel). The corresponding image analysis confirmed the visual observation showing that Mstn expression decreased by 5.5-fold compared with the control ( $P < 0.001$ ) (Fig. 6C, right panel).

### 1,25-D3 increases Fst expression in $C_2C_{12}$ skeletal muscle cells

To determine whether Fst, which inhibits Mstn activity *in vitro* and “*in vivo*,” is involved in the mechanism by which 1,25-D3 promotes muscle growth, we investigated Fst expression in  $C_2C_{12}$  myoblasts with and without 1,25-D3 incubation. Real-time qPCR revealed that after 4 d of continuous incubation with 1,25-D3, Fst expression was increased by 2.5-fold compared with controls ( $P < 0.01$ ) (Fig. 7A). Because Mstn expression was substantially down-regulated at 7 d by 1,25-D3, we determined the expression of Fst at the protein level by Western blotting. Figure 7B shows that the expression of Fst was up-regulated by 4.5-

fold compared with controls, suggesting that 1,25-D3 promotes myogenic differentiation by inhibiting Mstn activity, possibly through an increase in Fst expression.

### Discussion

The data presented in this manuscript demonstrate that the addition of 1,25-D3 to  $C_2C_{12}$  skeletal muscle cells



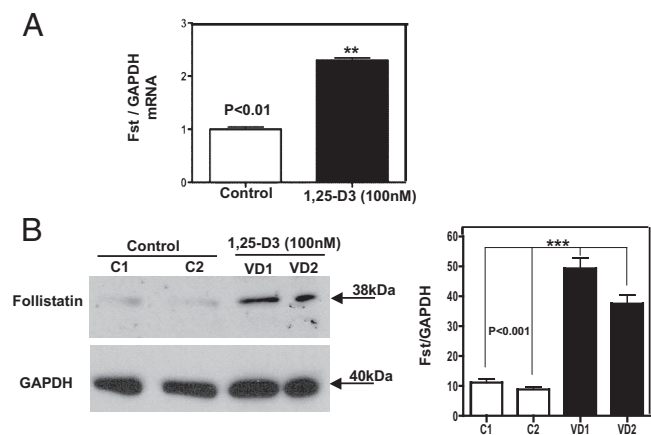

**FIG. 7.** Steady-state mRNA and protein up-regulation levels of Fst expression upon incubation of C<sub>2</sub>C<sub>12</sub> cells with 1,25-D<sub>3</sub>. Cultures of C<sub>2</sub>C<sub>12</sub> cells were incubated as in Fig. 1 for 4 and 7 d. Total RNA and whole-protein extracts were isolated for qRT-PCR and Western blottings. VD1 and VD2 are different pools of two samples each. Mean  $\pm$  SEM corresponds to experiments done in triplicate; \*\*,  $P < 0.01$  and \*\*\*,  $P < 0.001$ . A, Cells incubated or not with 1,25-D<sub>3</sub> for 1 d. B, Cells incubated or not with 1,25-D<sub>3</sub> for 4 d. VD, Vitamin treated cells whole extracts; C, control cells, non-incubated with 1,25-D<sub>3</sub>. C1 and C2 correspond to different pools of two samples each.

decreases cell proliferation and enhances myogenic differentiation through an increased expression and nuclear translocation of the VDR and modulation of pro- and antimyogenic factors. The increase in VDR expression, to some extent, is expected, because it is known that 1,25-D<sub>3</sub> autoregulates the expression of the VDR gene through intronic and upstream enhancers (26).

We demonstrated that the 1,25-D<sub>3</sub> effect on C<sub>2</sub>C<sub>12</sub> skeletal muscle cell line involves 1) an up-regulation of IGF-II expression, 2) a down-regulation of IGF-I expression, 3) an up-regulation of Fst expression (a Mstn inhibitor), and 4) specifically and most importantly a decrease in the expression of Mstn, the only known negative regulator of muscle mass.

Myogenesis of skeletal muscle cells is a highly ordered and sequential process. It starts with a period of proliferation followed by a differentiation process that generates myoblasts from mesodermal stem cells. A withdraw from the cell cycle guided by the expression of muscle-specific transcription factors, such as MyoD, myogenic factor 5, myogenin, and myogenic factor 4, leads to the fusion of myoblasts into multinucleated myotubes (27).

In this study, we demonstrated that addition of 1,25-D<sub>3</sub> to skeletal muscle cells induced an increased expression of several myogenic markers and transcription factors (e.g. MyoD, myogenin, and desmin) at different stages of differentiation. Moreover, addition of 1,25-D<sub>3</sub> significantly increased the mean diameter and size of the muscle fibers, indicated by the staining for MHC type II, a late myogenic marker (Fig. 8), a clear indication of fiber hypertrophy as a consequence of 1,25-D<sub>3</sub> administration.

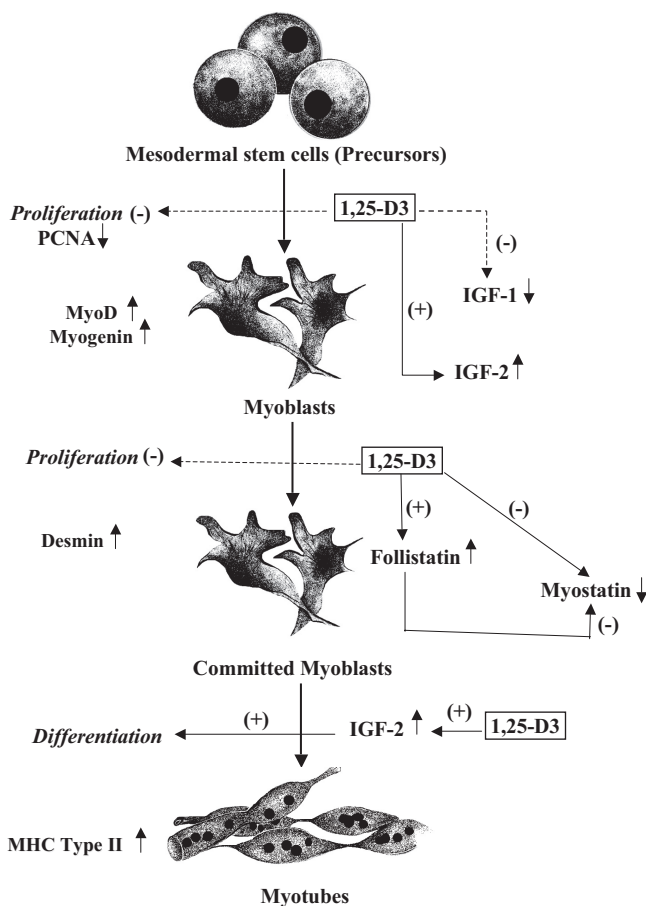

**FIG. 8.** Diagram of the role of vitamin D on muscle growth and differentiation. During development, mesodermal stem cells become committed to the myogenic fate. Muscle precursors (myoblasts) remain in a proliferative state until they exit from the cell cycle and are instructed to differentiate. Differentiation is accompanied by cell fusion, where committed myoblasts become polynucleated myotubes. 1,25-D<sub>3</sub> decreases cell proliferation and enhances myogenic cell differentiation by modulating the expression of key pro- and antimyogenic factors, such as IGF-I, IGF-II, Fst, and Mstn.

We also demonstrated that addition of 1,25-D<sub>3</sub> induced gene expression of pathways involved in myogenic differentiation, such as IGF and TGF $\beta$ -related signaling pathways. 1,25-D<sub>3</sub> displayed a differential effect on IGF, down-regulating IGF-I expression and simultaneously up-regulating IGF-II expression, which indicates that IGF-II is one of the main IGF factors responsible for muscle differentiation in the proposed system. The IGF signaling pathway plays a key role in regulating skeletal muscle growth, differentiation, and maintaining adult muscle tissue homeostasis (28). Moreover, IGF plays a critical role in adult muscle survival, regeneration, and hypertrophy (29, 30). Increased expression of IGF-II in muscle cells induces spontaneous differentiation with arrest in G<sub>0</sub> and fusion of committed myoblast to form myotubes (Fig. 8) (28). Furthermore, it has been demonstrated that there is a correlation between the amount of IGF-II produced by the myoblast cell line and the extent of differentiation (28). IGF-II is expressed

early in MyoD-induced myocyte differentiation and signals in an autocrine loop to activate phosphatidylinositol 3 kinase and serine-threonine kinase (31). It is known that IGF-II inhibition leads to a reduced expression of MyoD target genes, which suggests that IGF-II is essential for amplifying and maintaining MyoD efficacy (32).

Concerning the TGF $\beta$  signaling pathway, our study demonstrates, for the first time, that 1,25-D3 administration to C<sub>2</sub>C<sub>12</sub> skeletal muscle cells reduced the expression of Mstn, the only negative regulator of muscle mass known to date (33–35). Specifically, the decrease in Mstn expression is more evident at d 7 than at d 4, which is in agreement with our previous findings, where we demonstrated that Mstn expression is more pronounced at later stages in myoblast cell differentiation (16). Furthermore, the decreased expression of Mstn by 1,25-D3 is specific and does not affect its highly related TGF $\beta$  family member GDF-11. It has been shown that loss of GDF-11 in mice causes dramatic anterior homeotic transformations of the axial skeleton but does not affect muscle size, fiber number, or fiber type (36).

Fst is a Mstn-binding protein that can inhibit Mstn activity *in vitro* and promote muscle growth *in vivo* (37). It has been demonstrated that Fst antagonizes Mstn by a direct protein interaction, preventing Mstn from executing its inhibitory effect on muscle development (37, 38). In the present study, we demonstrate, for the first time to our knowledge, a direct effect of 1,25-D3 on increasing Fst expression related to muscle differentiation. Our result reinforces the promyogenic effect of 1,25-D3 on skeletal muscle differentiation by decreasing Mstn at the steady-state mRNA and protein level and possibly by inhibiting Mstn activity through an increase in Fst expression. Further studies need to be performed to confirm this assumption.

In summary, the data presented in this article demonstrate a direct effect of 1,25-D3 on myogenic cell differentiation by promoting a direct promyogenic effect by increasing IGF-II and Fst expression and by an indirect promyogenic effect, decreasing Mstn expression. Further studies addressing the possibility that 1,25-D3 regulation of myogenic gene expression could be secondary to primary control of up-stream transcription factors appear warranted.

This study provides a mechanistic justification for clinical studies to examine the administration of active vitamin D and/or novel VDR activators (to avoid the hypercalcemic side effects) and even the potential role of emerging therapies directed to trigger select vitamin D-regulated muscle pathways in the treatment of adverse muscle conditions.

## Acknowledgments

Address all correspondence and requests for reprints to: Jorge N. Artaza, M.S., Ph.D., Department of Internal Medicine, Charles R. Drew University of Medicine and Science, 1731 East 120th Street, Los Angeles, California 90059. E-mail: joartaza@ucla.edu.

This work was supported by National Institutes of Health Grants RR026138, RR022762, MD000182, SC1NS064611, and MD000103.

Disclosure Summary: The authors have nothing to disclose.

## References

- Holick MF 2006 The role of vitamin D for bone health and fracture prevention. *Curr Osteoporos Rep* 4:96–102
- Glerup H, Mikkelsen K, Poulsen L, Hass E, Overbeck S, Andersen H, Charles P, Eriksen EF 2000 Hypovitaminosis D myopathy without biochemical signs of osteomalacic bone involvement. *Calcif Tissue Int* 66:419–424
- Bordelon P, Ghetu MV, Langan RC 2009 Recognition and management of vitamin D deficiency. *Am Fam Physician* 80:841–846
- Ceglia L 2009 Vitamin D and its role in skeletal muscle. *Curr Opin Clin Nutr Metab Care* 12:628–633
- Wicherts IS, van Schoor NM, Boeke AJ, Visser M, Deeg DJ, Smit J, Knol DL, Lips P 2007 Vitamin D status predicts physical performance and its decline in older persons. *J Clin Endocrinol Metab* 92:2058–2065
- Bischoff-Ferrari HA 2010 Vitamin D and fracture prevention. *Endocrinol Metab Clin North Am* 39:347–353, table of contents
- Bischoff-Ferrari HA, Dietrich T, Orav EJ, Hu FB, Zhang Y, Karlson EW, Dawson-Hughes B 2004 Higher 25-hydroxyvitamin D concentrations are associated with better lower-extremity function in both active and inactive persons aged  $\geq$  60 y. *Am J Clin Nutr* 80:752–758
- Heath KM, Elovic EP 2006 Vitamin D deficiency: implications in the rehabilitation setting. *Am J Phys Med Rehabil* 85:916–923
- Bischoff-Ferrari HA, Borchers M, Gudat F, Dürmüller U, Stähelin HB, Dick W 2004 Vitamin D receptor expression in human muscle tissue decreases with age. *J Bone Miner Res* 19:265–269
- Snijder MB, van Schoor NM, Pluijm SM, van Dam RM, Visser M, Lips P 2006 Vitamin D status in relation to one-year risk of recurrent falling in older men and women. *J Clin Endocrinol Metab* 91:2980–2985
- Ceglia L 2008 Vitamin D and skeletal muscle tissue and function. *Mol Aspects Med* 29:407–414
- Bouillon R, Bischoff-Ferrari H, Willett W 2008 Vitamin D and health: perspectives from mice and man. *J Bone Miner Res* 23:974–979
- Endo I, Inoue D, Mitsui T, Umaki Y, Akaike M, Yoshizawa T, Kato S, Matsumoto T 2003 Deletion of vitamin D receptor gene in mice results in abnormal skeletal muscle development with deregulated expression of myoregulatory transcription factors. *Endocrinology* 144:5138–5144
- Holick MF 2011 Vitamin D: evolutionary, physiological and health perspectives. *Curr Drug Targets* 12:4–18
- Willett M, Cowan JL, Vlasak M, Coldwell MJ, Morley SJ 2009 Inhibition of mammalian target of rapamycin (mTOR) signalling in C2C12 myoblasts prevents myogenic differentiation without affecting the hyperphosphorylation of 4E-BP1. *Cell Signal* 21:1504–1512
- Artaza JN, Bhasin S, Mallidis C, Taylor W, Ma K, Gonzalez-Cadavid NF 2002 Endogenous expression and localization of myostatin and its relation to myosin heavy chain distribution in C2C12 skeletal muscle cells. *J Cell Physiol* 190:170–179
- Taylor WE, Bhasin S, Artaza J, Byhower F, Azam M, Willard Jr DH,

- Kull Jr FC, Gonzalez-Cadavid N 2001 Myostatin inhibits cell proliferation and protein synthesis in C2C12 muscle cells. *Am J Physiol Endocrinol Metab* 280:E221–E228
18. Artaza JN, Sirad F, Ferrini MG, Norris KC 2010 1,25(OH)<sub>2</sub> vitamin D<sub>3</sub> inhibits cell proliferation by promoting cell cycle arrest without inducing apoptosis and modifies cell morphology of mesenchymal multipotent cells. *J Steroid Biochem Mol Biol* 119:73–83
  19. Artaza JN, Norris KC 2009 Vitamin D reduces the expression of collagen and key profibrotic factors by inducing an antifibrotic phenotype in mesenchymal multipotent cells. *J Endocrinol* 200:207–221
  20. Cardús A, Parisi E, Gallego C, Aldea M, Fernández E, Valdivielso JM 2006 1,25-Dihydroxyvitamin D<sub>3</sub> stimulates vascular smooth muscle cell proliferation through a VEGF-mediated pathway. *Kidney Int* 69:1377–1384
  21. Khanna-Jain R, Vuorinen A, Sándor GK, Suuronen R, Miettinen S 2010 Vitamin D(3) metabolites induce osteogenic differentiation in human dental pulp and human dental follicle cells. *J Steroid Biochem Mol Biol* 122:133–141
  22. Barbosa EM, Nonogaki S, Katayama ML, Figueira MA, Alves VF, Brentani MM 2004 Vitamin D<sub>3</sub> modulation of plasminogen activator inhibitor type-1 in human breast carcinomas under organ culture. *Virchows Arch* 444:175–182
  23. Ramirez AM, Wongtrakool C, Welch T, Steinmeyer A, Zügel U, Roman J 2010 Vitamin D inhibition of pro-fibrotic effects of transforming growth factor  $\beta$ 1 in lung fibroblasts and epithelial cells. *J Steroid Biochem Mol Biol* 118:142–150
  24. Artaza JN, Singh R, Ferrini MG, Braga M, Tsao J, Gonzalez-Cadavid NF 2008 Myostatin promotes a fibrotic phenotypic switch in multipotent C3H 10T1/2 cells without affecting their differentiation into myofibroblasts. *J Endocrinol* 196:235–249
  25. Artaza JN, Bhasin S, Magee TR, Reisz-Porszasz S, Shen R, Groome NP, Meerasahib MF, Fareez MM, Gonzalez-Cadavid NF 2005 Myostatin inhibits myogenesis and promotes adipogenesis in C3H 10T(1/2) mesenchymal multipotent cells. *Endocrinology* 146:3547–3557
  26. Pike JW, Meyer MB 2010 The vitamin D receptor: new paradigms for the regulation of gene expression by 1,25-dihydroxyvitamin D(3). *Endocrinol Metab Clin North Am* 39:255–269, table of contents
  27. Weintraub H 1993 The MyoD family and myogenesis—redundancy, networks, and thresholds. *Cell* 75:1241–1244
  28. Florini JR, Ewton DZ, Magri KA, Mangiacapra FJ 1993 IGFs and muscle differentiation. *Adv Exp Med Biol* 343:319–326
  29. Florini JR, Magri KA, Ewton DZ, James PL, Grindstaff K, Rotwein PS 1991 Spontaneous differentiation of skeletal myoblasts is dependent upon autocrine secretion of insulin-like growth factor-II. *J Biol Chem* 266:15917–15923
  30. Lawlor MA, Rotwein P 2000 Insulin-like growth factor-mediated muscle cell survival: central roles for Akt and cyclin-dependent kinase inhibitor p21. *Mol Cell Biol* 23:8983–8995
  31. Wilson EM, Hsieh MM, Rotwein P 2003 Autocrine growth factor signaling by insulin-like growth factor-II mediates MyoD-stimulated myocyte maturation. *J Biol Chem* 278:41109–41113
  32. Wilson EM, Rotwein P 2006 Control of MyoD function during initiation of muscle differentiation by an autocrine signaling pathway activated by insulin-like growth factor-II. *J Biol Chem* 281:29962–29971
  33. McPherron AC, Lawler AM, Lee SJ 1997 Regulation of skeletal muscle mass in mice by a new TGF- $\beta$  superfamily member. *Nature* 387:83–90
  34. McPherron AC, Lee SJ 1997 Double muscling in cattle due to mutations in the myostatin gene. *Proc Natl Acad Sci USA* 94:12457–12461
  35. Lee SJ, McPherron AC 2001 Regulation of myostatin activity and muscle growth. *Proc Natl Acad Sci USA* 98:9306–9311
  36. McPherron AC, Huynh TV, Lee SJ 2009 Redundancy of myostatin and growth/differentiation factor 11 function. *BMC Dev Biol* 19:9–24
  37. Amthor H, Nicholas G, McKinnell I, Kemp CF, Sharma M, Kambadur R, Patel K 2004 Follistatin complexes myostatin and antagonizes myostatin-mediated inhibition of myogenesis. *Dev Biol* 270:19–30
  38. Lee SJ, Lee YS, Zimmers TA, Soleimani A, Matzuk MM, Tsuchida K, Cohn RD, Barton ER 2010 Regulation of muscle mass by follistatin and activins. *Mol Endocrinol* 24:1998–2008

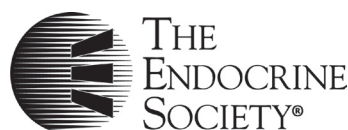

**Sign up for eTOC alerts today**  
to get the latest articles as soon as they are online.

<http://endo.endojournals.org/subscriptions/etoc.shtml>
